# Supplementary material for: RAD50 and NBS1 form a stable complex functional in DNA binding and tethering
Source: PubMed Central journal article supplement — Nucleic Acids Res. 2009 Jan 16;37(5):1580–8. doi: 10.1093/nar/gkn1072 (PMC2655673; doi:10.1093/nar/gkn1072), 2009-01-16
Supplement: gkn1072_1.pdf [file gkn1072_1.pdf]

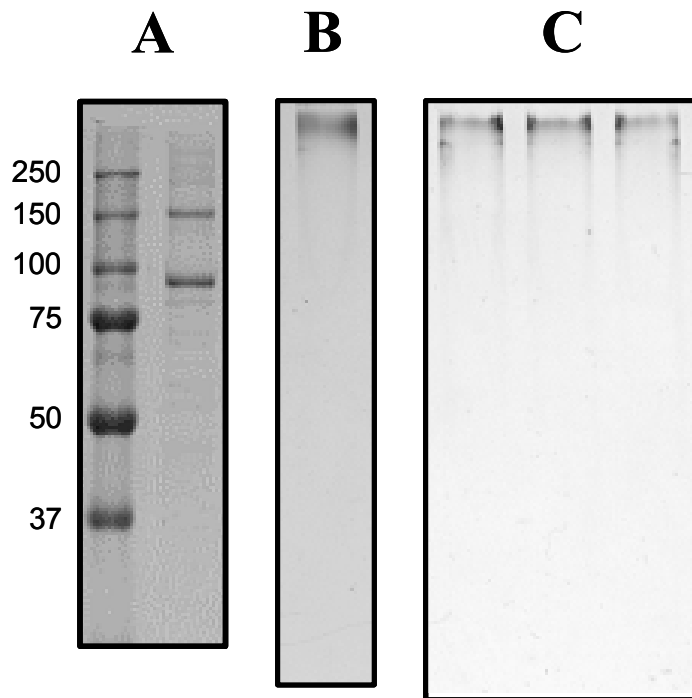

**Supplementary Figure S1.** PAGE analysis of purified RM, RMN, RN, and an RN-containing side fraction observed during RMN purification. Coomassie stained 8% SDS-PAGE gel (A) and native 6% PAGE gel (B) of a fraction collected from gelfiltration during an RMN purification that mainly contained RAD50 and NBS1. Lane 1 of A, molecular size marker (molecular mass indicated in kDa). (C) Coomassie stained native 7.5% PAGE gel of purified protein preparations. Lane 1, RM complex, lane 2, RMN complex, Lane 3, RN complex.
