# Supplementary material for: RAD50 and NBS1 form a stable complex functional in DNA binding and tethering
Source: PubMed Central journal article supplement — Nucleic Acids Res. 2009 Jan 16;37(5):1580–8. doi: 10.1093/nar/gkn1072 (PMC2655673; doi:10.1093/nar/gkn1072), 2009-01-16
Supplement: gkn1072_2.pdf [file gkn1072_2.pdf]

**A**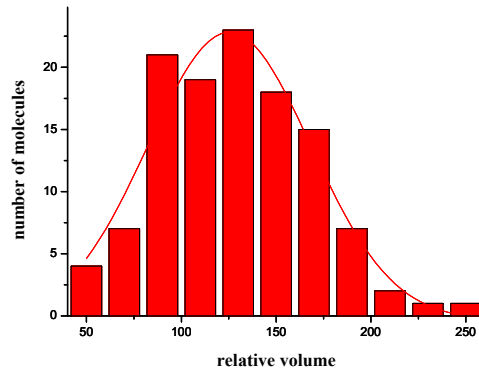**B**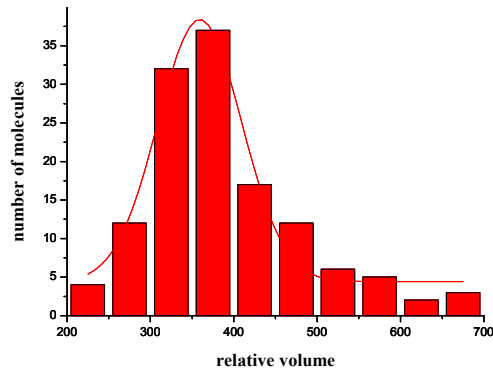**C**

| Protein | Volume <sup>a</sup> | SEM | No. molecules | Size (kDa)       |
|---------|---------------------|-----|---------------|------------------|
| Ku70/80 | 125                 | 3.4 | 108           | 155              |
| RM      | 359                 | 4.2 | 130           | 444 <sup>b</sup> |

**Supplementary Figure S2.** The size of RM complex estimated from SFM-based volume analysis of RM and Ku heterodimer. Volume distribution of Ku heterodimer (A) and RM complex (B). The lines represent the Gaussian fitting of the distribution and the values obtained are used to calculate the size of RM (C).

<sup>a</sup> arbitrary units

<sup>b</sup> Molecular weight of RM is determined by multiplying the measured number of Ku70/80 equivalents for RM with the size of the Ku70/80 protein (155 kDa).
