# Supplementary material for: RAD50 and NBS1 form a stable complex functional in DNA binding and tethering
Source: PubMed Central journal article supplement — Nucleic Acids Res. 2009 Jan 16;37(5):1580–8. doi: 10.1093/nar/gkn1072 (PMC2655673; doi:10.1093/nar/gkn1072), 2009-01-16
Supplement: gkn1072_3.pdf [file gkn1072_3.pdf]

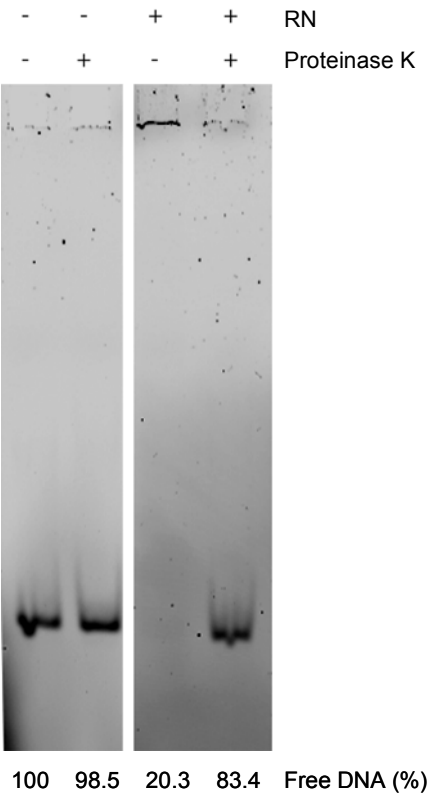

**Supplementary Figure S3.** Disappearance of the free DNA is not due to contaminating nuclease activity. Alexa Fluor 532 labeled dsDNA66 (1 nM) was incubated at 37 °C with RN (125 ng) and Proteinase K (1 mg/ml), as indicated, in a final volume of 20  $\mu$ l. Complexes formed were separated by 5% non-denaturing PAGE and visualized by fluorescence scanning. For each lane, the amount of free DNA was quantified as shown below.
